# Supplementary material for: A Company Is Only as Healthy as Its Workers: A 6-Month Metabolic Health Management Pilot Program Improves Employee Health and Contributes to Cost Savings
Source: MDPI journal article supplement (doi:10.3390/metabo12090848), 2022-09-09
Supplement: s1 [file s1]

## Body Mass Index

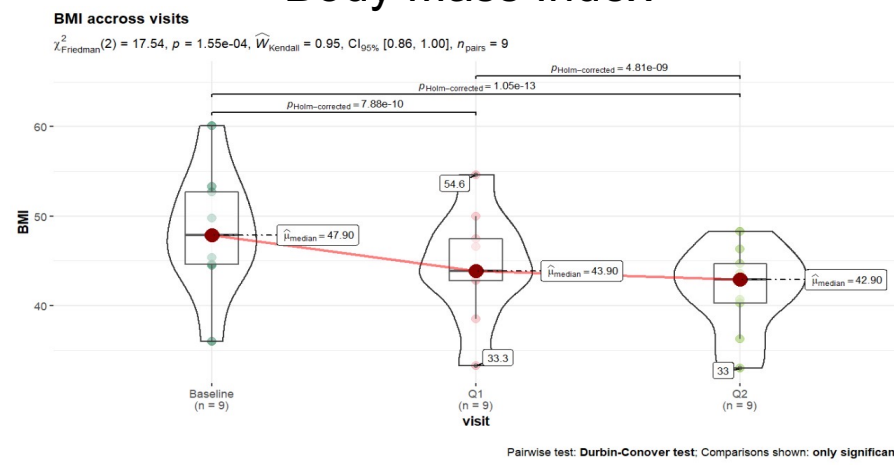

## C-Reactive Protein

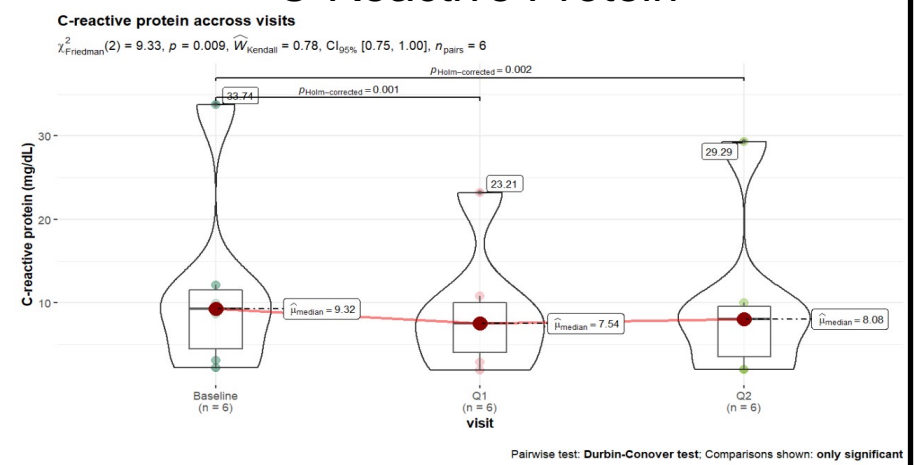

## HbA1c and HOMA-IR

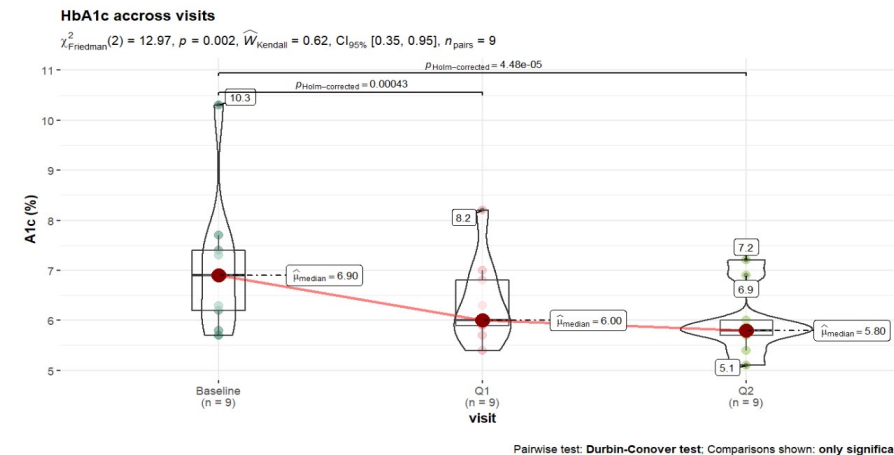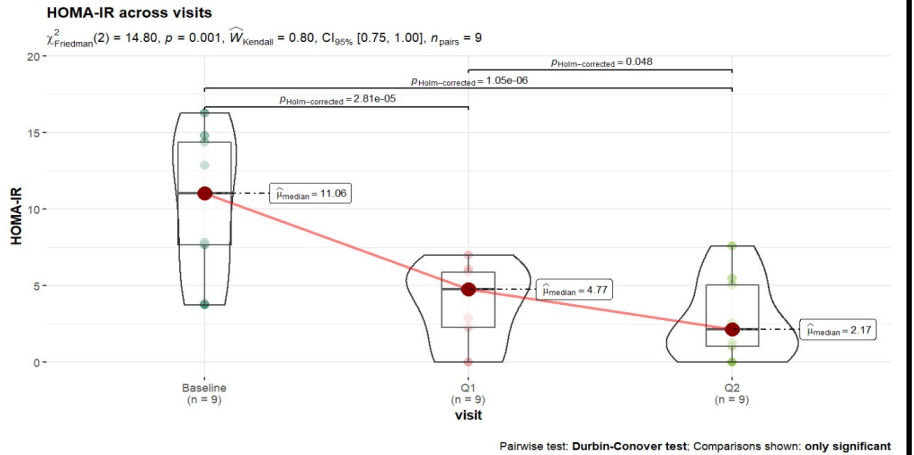

## Total and HDL cholesterol

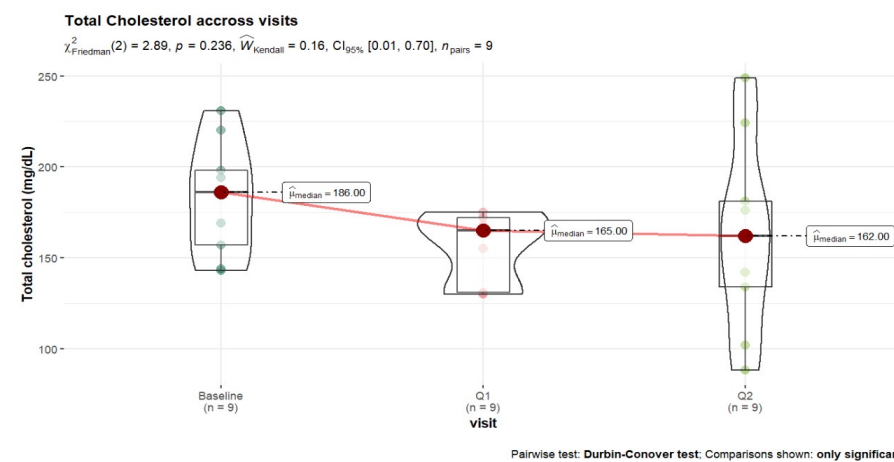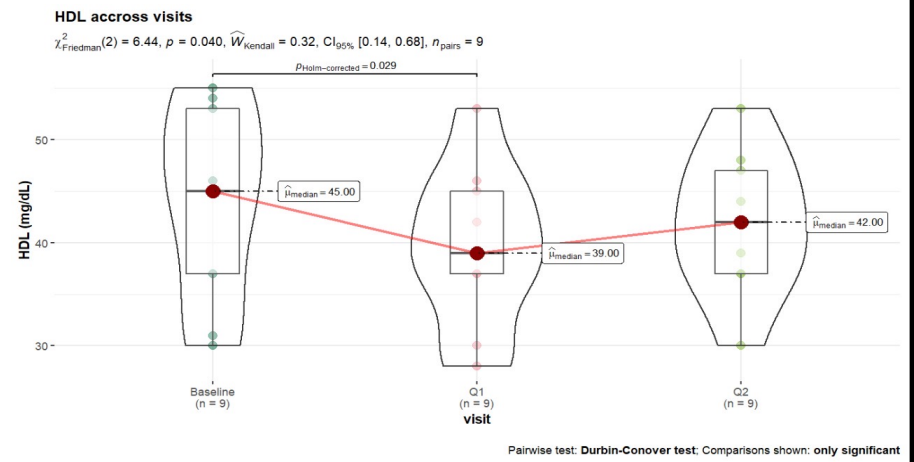

## Blood pressure

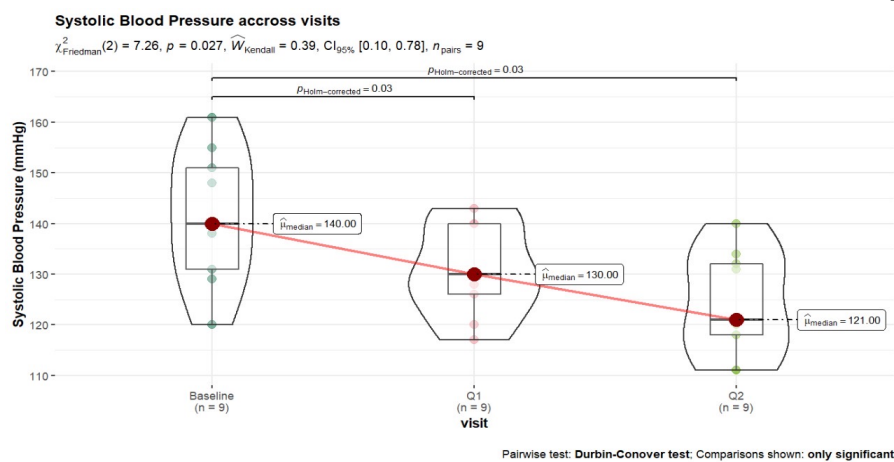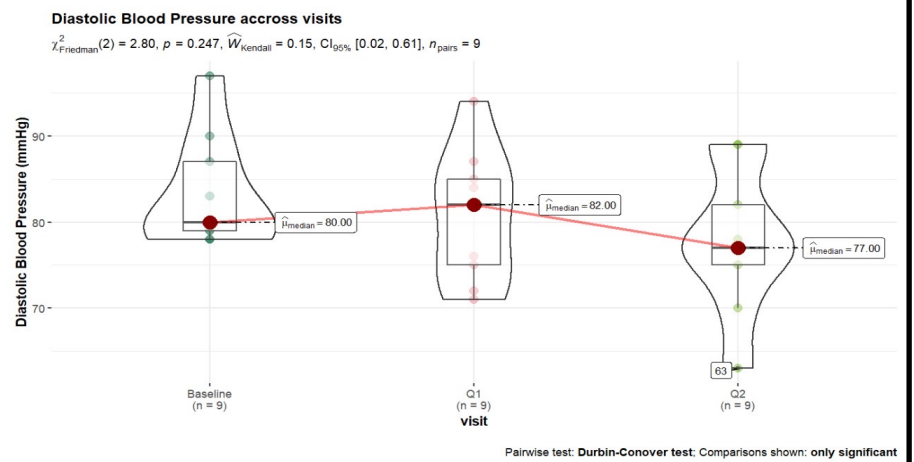

## ACC/AHA 10-year Scores

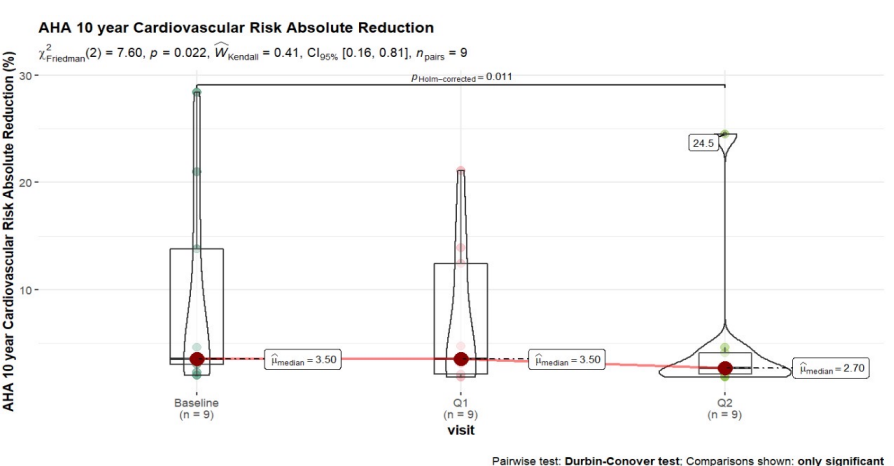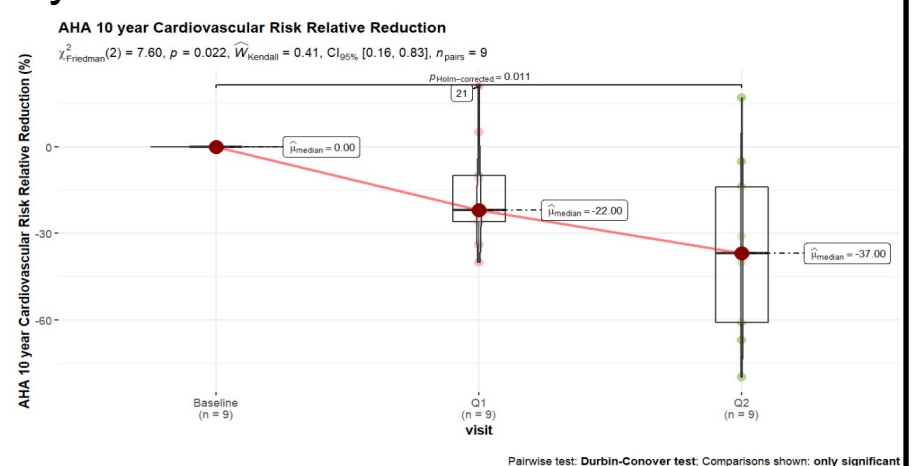

Supplementary Figure S1: Change in weight, ACC/AHA risk score, and metabolic health markers over 24 weeks. Violin box plots with distribution curves were created using the function `ggstatsplot::ggwithinstats`.

| Avg Retail Price Cost Savings |                |              |                    |             |
|-------------------------------|----------------|--------------|--------------------|-------------|
| Medication Name               | Quantity       | Monthly Cost | Quantity           | Annual Cost |
| Omeprazole 40mg               | 30 tablets     | \$64.14      | 365 tablets        | \$672.88    |
| Omeprazole 40mg               | 30 tablets     | \$64.14      | 365 tablets        | \$672.88    |
| Metformin 1000mg              | 60 tablets     | \$14.63      | 730 tablets        | \$84.80     |
| Metformin 1000mg              | 60 tablets     | \$14.63      | 730 tablets        | \$84.80     |
| Chlorthalidione 50mg          | 30 tablets     | \$33.16      | 365 tablets        | \$334.93    |
| Pantoprazole 40mg             | 30 tablets     | \$62.50      | 365 tablets        | \$521.77    |
| HCTZ 25mg                     | 30 tablets     | \$8.35       | 365 tablets        | \$38.52     |
| HCTZ 25mg                     | 30 tablets     | \$8.35       | 365 tablets        | \$38.52     |
| Sitagliptin 100mg             | 30 tablets     | \$520.21     | 365 tablets        | \$5,974.15  |
| Sitagliptin 100mg             | 30 tablets     | \$520.21     | 365 tablets        | \$5,974.15  |
| Insulin Lispro (60units qd)   | 2 vials/month  | \$283.41     | 22 vials/yr        | \$2,899.51  |
| Insulin Glargine (40units qd) | 1 carton/month | \$194.29     | 12 cartons/yr      | \$2,331.48  |
| Dulaglutide 4.5mg             | 1 box          | \$1,029.00   | 12 boxes/yr        | \$12,348    |
| Dulaglutide 4.5mg             | 1 box          | \$1,029.00   | 12 boxes/yr        | \$12,348    |
| Fenofibrate 160mg             | 30 tablets     | \$56.00      | 365 tablets        | \$460.62    |
| Gemfibrozil 600mg             | 60 tablets     | \$27.88      | 730 tablets        | \$270.63    |
| Benazepril 40mg               | 30 tablets     | \$14.44      | 365 tablets        | \$116.06    |
|                               |                |              | Annualized Savings | \$45,171.70 |

Supplementary Table S1: Annualized medication cost savings.
